# Supplementary material
Source: publisher figshare collection journal article supplement (https://geolsoc.figshare.com/articles/dataset/_/3454568)
Supplement: Supplementary file 1 [file 1]

## Appendix C: Magnetic susceptibility and remanence data

| location              | code   | N  | suss                          | NRM                                | initial direction  |                     | Palaeo direction |                  |
|-----------------------|--------|----|-------------------------------|------------------------------------|--------------------|---------------------|------------------|------------------|
|                       |        |    | $\chi$<br>10 <sup>-2</sup> SI | M <sub>r</sub><br>Am <sup>-1</sup> | D(0)<br>deg<br>ETN | I(0)<br>deg<br>down | D<br>deg<br>ETN  | I<br>deg<br>down |
| <b>Cleveland Dyke</b> |        |    |                               |                                    |                    |                     |                  |                  |
| Shearington           | SHE295 | 10 | 2.65                          | 1.24                               | 121                | 33                  | 156              | -64              |
|                       | SHE395 | 7  | 2.25                          | 2.18                               | 177                | -35                 | 144              | -65              |
| Lochanhead            | LNH194 | 6  | 2.17                          | 3.32                               | 137                | -64                 | 157              | -68              |
|                       | LNH1   | 7  | 2.87                          | 5.93                               | 135                | -60                 | 142              | -61              |
|                       | LNH495 | 6  | 2.81                          | 4.96                               | 143                | -59                 | 152              | -68              |
| Braco                 | BRA3   | 6  | 2.63                          | 1.06                               | 67                 | -60                 | 165              | -63              |
|                       | BRA1   | 6  | 4.21                          | 1.30                               | 187                | -46                 | 166              | -61              |
| Skeoch lower          | G001   | 10 | 3.25                          | 1.40                               | 135                | -51                 | 143              | -63              |
| Skeoch upper          | SK2    | 11 | 3.35                          | 0.55                               | 225                | -45                 | 159              | -62              |
| Bishop Forest Hill    | BFH    | 2  | 2.65                          | 1.22                               |                    |                     |                  |                  |
| Muil Hill             | MU1    | 8  | 2.80                          | 2.77                               | 143                | -46                 | 146              | -62              |
| Darngarroch Hill      | DN1    | 6  | 3.79                          | 4.82                               | 159                | -41                 | 147              | -67              |
| Castramon Hill        | CAS    | 1  | 3.08                          | 12.52                              |                    |                     |                  |                  |
| Craigmuiie Moor       | LUG1   | 9  | 3.07                          | 2.92                               | 160                | 19                  | 136              | -27              |
| Shield Burn           | MG10   | 7  | 3.15                          | 1.52                               | 142                | -30                 | 142              | -64              |
|                       | MG6    | 7  | 2.66                          | 3.09                               | 157                | -60                 | 158              | -62              |
|                       | MG5    | 7  | 2.36                          | 0.76                               | 123                | -15                 | 152              | -70              |
|                       | MG4a   | 6  | 2.02                          | 1.54                               | 306                | 63                  | 219              | -76              |
| Cornharrow            | CRN    |    | 2.27                          | 23.40                              |                    |                     |                  |                  |
| Dodd Hill             | WK3    | 2  | 3.18                          | 10.04                              |                    |                     |                  |                  |
| Midrig                | WS989  | 2  | 2.49                          | 5.47                               | 279                | -1                  |                  |                  |
| Windy Standard        | WS976  | 4  | 2.05                          |                                    |                    |                     |                  |                  |
| Glenhastel            | GLH    | 1  | 3.40                          | 16.27                              |                    |                     |                  |                  |
| Polga Burn            | PB     | 2  | 2.03                          | 8.64                               |                    |                     |                  |                  |
| Polmath Burn          | PMB    | 1  | 3.58                          | 14.55                              |                    |                     |                  |                  |

| location                         | code | N | suss                | NRM                | initial direction  |                     | Palaeo direction |                  |  |
|----------------------------------|------|---|---------------------|--------------------|--------------------|---------------------|------------------|------------------|--|
|                                  |      |   | $X$<br>$10^{-2}$ SI | $M_r$<br>$Am^{-1}$ | D(0)<br>deg<br>ETN | I(0)<br>deg<br>down | D<br>deg<br>ETN  | I<br>deg<br>down |  |
| <b>Other Dykes</b>               |      |   |                     |                    |                    |                     |                  |                  |  |
| Kello Water                      | KW01 | 1 | 4.62                | 0.53               |                    |                     |                  |                  |  |
| Afton Water<br>(Dalleagles Burn) | AW07 | 1 | 7.78                | 4.72               |                    |                     |                  |                  |  |
| Mossdale                         | M001 | 1 | 0.65                | 4.04               |                    |                     |                  |                  |  |
| Stoneyburn                       | SB01 | 3 | 3.73                | 1.21               |                    |                     |                  |                  |  |
| Dalgig Burn                      | D001 | 2 | 0.94                | 0.99               |                    |                     |                  |                  |  |
| Kirkland (Vennel)                | V001 | 1 | 2.21                | 0.92               |                    |                     |                  |                  |  |

#### Average palaeomagnetic direction for Cleveland Dyke sites in northern England

|                                    |                        | suss                | Palaeodirection |                  |
|------------------------------------|------------------------|---------------------|-----------------|------------------|
|                                    |                        | $X$<br>$10^{-2}$ SI | D<br>deg<br>ETN | I<br>deg<br>down |
| Dagley, 1969                       | 3 sites,<br>16 samples | 2.3                 | 160             | -65              |
| Giddings, 1974<br>(averaged by PD) | 9 sites,<br>76 samples |                     | 159             | -63              |

#### Directional data for some non-Tertiary dykes and sills for comparison

|                  |                                 |  |     |     |
|------------------|---------------------------------|--|-----|-----|
| Wackerfield dyke | Tarling et. al., 1973           |  | 186 | -26 |
| Whin Sill        | Creer et. al., 1959             |  | 188 | -5  |
| Whin Sill        | Storetvedt and Gidskehaug, 1969 |  | 194 | -22 |

#### References

- Creer, K.M., Irving, E., and Nairn, A.E.M., 1959. "Palaeomagnetism of the Great Whin Sill." *Geophysical Journal of the Royal Astronomical Society*, 2, 306.
- Dagley, P. 1969. "Palaeomagnetic results from some British Tertiary Dykes." *Earth and Planetary Science Letters*, 6, 349-254.
- Giddings, J.W., Tarling, D.H. and Thomas, D.H., 1974. "The Palaeomagnetism of the Cleveland-Armathwaite Dyke, Northern England." *Transactions of the Natural History Society of Northumberland, Durham, and Newcastle-upon-Tyne*, 41(3), 220-226.
- Storetvedt, K.M., and Gidskehaug, A., 1969. "The magnetisation of the Great Whin Sill, Northern England." *Physics of the Earth and Planetary Interiors*, 2, 105.
- Tarling, D.H., Mitchell, J.M. and Spall, H., 1973. "A Palaeomagnetic and Isotopic Age for the Wackerfield Dyke of Northern England." *Earth and Planetary Science Letters*, 18, 427-432.
