# Supplementary material
Source: publisher figshare collection journal article supplement (https://geolsoc.figshare.com/articles/dataset/_/3454568)
Supplement: Supplementary file 2 [file 1]

**Appendix D: Geochemical samples** (localities listed in order from SE to NW).

| <b>Locality</b>       | <b>code</b>  | <b>grid reference</b> | <b>notes</b>                                                                            |
|-----------------------|--------------|-----------------------|-----------------------------------------------------------------------------------------|
| Shearington           | CD41         | NY 0293 6664          |                                                                                         |
|                       | CD39         | NY 0263 6678          |                                                                                         |
| Highmains             | CD101        | NY 01383 67736        | boulder adjacent to magnetic anomaly                                                    |
| Boreland              | CD88         | NY 99569 71034        | very large boulder adjacent to magnetic anomaly                                         |
| Mabie Forest          | CD105        | NY 93350 72500        | boulder adjacent to magnetic anomaly                                                    |
| Woodfoot Wood         | CD94         | NX 93077 73069        | blocks by old A711                                                                      |
| Lochanhead            | CD38         |                       | 20 m SE of CD25                                                                         |
|                       | CD25         | NX 9167 7202          |                                                                                         |
|                       | CD23         | NX 9161 7204          |                                                                                         |
|                       | CD34         | NX 9154 7210          |                                                                                         |
| Braco                 | CD79         | NX 87465 75625        | boulders from excavation for new barn                                                   |
|                       | CD78         | NX 8736 7588          |                                                                                         |
|                       | CD57         | NX 8733 7576          | NE non-porphyritic dyke<br>SW porphyritic dyke                                          |
|                       | CD58, CD59   | NX 8733 7576          |                                                                                         |
| Skeoch Hill           | CD21         | NX 8610 7830          | lower dyke                                                                              |
|                       | CD22         | NX 8605 7848          | upper dyke                                                                              |
| Bishop Forest Hill    | CD26         | NX 8528 7964          |                                                                                         |
| Speddoch Hill         | CD56         | NX 8365 8060          | boulders adjacent to new forestry track                                                 |
| Muil Hill             | CD27         | NX 8174 8086          | eastern outcrop                                                                         |
|                       | CD28         |                       | western outcrop                                                                         |
| Darngarroch Hill      | CD30         | NX 8032 8157          | chilled margin W of triangulation obelisk<br>coarser-grained facies from centre of dyke |
|                       | CD31         | NX 8029 8160          |                                                                                         |
|                       | CD80         | NX 8095 8128          |                                                                                         |
|                       | CD81         | NX 8090 8135          |                                                                                         |
| Nether Craigenputtock | CD61         | NX 78650 83525        | large block adjacent to magnetic anomaly                                                |
| Castramon Hill        | CD92         | NX 78226 83513        | 1 m wide dyke. CD89 from chilled margin                                                 |
|                       | CD89, CD90   | NX 78173 83431        |                                                                                         |
| Lochurr Hill          | CD55         | NX 7595 8565          | lower slopes of Lochurr Hill                                                            |
| Craigmuaie Moor       | CD13, CD52   | NX 7395 8610          | 20 m S of CD13<br>CD12 centre, CD 51 chilled margin of dyke                             |
|                       | CD15         |                       |                                                                                         |
|                       | CD12, CD51   | NX 73875 86175        |                                                                                         |
| Shield Burn           | CD10         | NX 73345 87840        | 150 m SE of Shield Burn<br>Gully, east of bifurcation<br>100 m NW of burn               |
|                       | CD8          | NX 7326 8796          |                                                                                         |
|                       | CD47         | NX 73195 88030        |                                                                                         |
|                       | CD7          | NX 7319 8804          | 10 m NW of CD7                                                                          |
|                       | CD6          |                       |                                                                                         |
|                       | CD5          | NX 73165 88065        | 10 m SE of CD46<br>250 m NW of burn                                                     |
|                       | CD4          |                       |                                                                                         |
|                       | CD46         | NX 7309 8816          |                                                                                         |
|                       | CD2          | NX 72780 88415        | 750 m NW of burn                                                                        |
| CD1                   | NX 7271 8847 |                       |                                                                                         |
| Carroch Hill          | CD102        | NX 66763 92318        | boulder from forest road excavation                                                     |
|                       | CD103        | NX 66798 92349        | Boulder from forest road excavation                                                     |

|                 |              |                              |                                          |
|-----------------|--------------|------------------------------|------------------------------------------|
| Dodd Hill       | WK3, WK4     | NS 65175 98787               | WK3 centre, WK4 chilled margin of dyke15 |
| Midrig          | CD82         | NS 6494 0027                 |                                          |
| Windy Standard  | CD73<br>CD75 | NS 6155 0299<br>NS 6126 0323 | boulders from recently excavated trench  |
| Glenhastel Burn | CD86         | NS 5985 0610                 |                                          |
| Polga Burn      | CD93         | NS 57500 07595               |                                          |
| Polmath Burn    | CD100        | NS 54879 09246               |                                          |

#### **Other Tertiary dykes in Southern Uplands**

|                  |            |                              |                                                                        |
|------------------|------------|------------------------------|------------------------------------------------------------------------|
| Kello Water      | KW1<br>KW2 | NS 6882 0908<br>NS 6912 0898 |                                                                        |
| Afton Water      | AW1        | NS 6136 1140                 | 100 m S of Burns Memorial                                              |
| Mossdale Dyke    | M1         | NS 49398 03962               | in river 2 km S of Dalmellington                                       |
| Dalgig Burn      | DB         | NS 55767 13040               | west bank of burn                                                      |
| Kirkland Dyke    | V1         | NS 72800 15050               | Glenaylmer Burn waterfall, Vennel                                      |
| Stoneyburn Dyke  | S1, S4     | NS 95900 19225               | S1 chilled margin, S4 interior of dyke                                 |
| Eskdalemuir Dyke | E2<br>E1   | NT 1105 0210<br>NT 0780 0435 | Breconside, 3 km SSE of Moffat<br>Coatshill Quarry, 1 km SSW of Moffat |
