# Supplementary material
Source: publisher figshare collection journal article supplement (https://geolsoc.figshare.com/articles/dataset/_/3454568)
Supplement: Supplementary file 3 [file 1]

## Appendix A

## Location of traverses and anomaly minima

*Grid references (all digit for uniqueness) give location to nearest metre from grid origin*

| Location                    | Code    | Start point of line |          | Position of Minima |          |                |          |                |          |                |          |
|-----------------------------|---------|---------------------|----------|--------------------|----------|----------------|----------|----------------|----------|----------------|----------|
|                             |         | grid reference      |          | grid reference     |          | grid reference |          | grid reference |          | grid reference |          |
|                             |         | easting             | northing | easting            | northing | easting        | northing | easting        | northing | easting        | northing |
|                             |         | m                   | m        | m                  | m        | m              | m        | m              | m        | m              | m        |
| <b>Cleveland Dyke</b>       |         |                     |          |                    |          |                |          |                |          |                |          |
| Shearington, Lands          | SHE195  | 304180              | 566120   |                    |          |                |          |                |          |                |          |
| Shearington, below scrp     | SHE292  | 303150              | 566640   | 303114             | 566563   |                |          |                |          |                |          |
| Shearington, on road        | SHE192  | 303051              | 566450   | 303042             | 566579   | 303029         | 566515   |                |          |                |          |
| Shearington, in field       | SHE295* | 302890              | 566550   | 302937             | 566638   | 302932         | 566629   |                |          |                |          |
| Shearington, Woodlaw        | SHE395* | 302725              | 566800   | 302629             | 566771   |                |          |                |          |                |          |
| Lanarkland, in field        | SHE0014 | 302030              | 566915   | 302286             | 566984   | 302267         | 566978   | 302218         | 566965   |                |          |
| Lanarkland, entrance track  | SHE0015 | 301860              | 567115   | 302000             | 567153   |                |          |                |          |                |          |
| Lanarkland, road            | SHE492  | 301850              | 567050   | 301968             | 567489   | 301941         | 567388   |                |          |                |          |
| Lanarkland, road            | SHEn495 |                     |          | 302035             | 568236   | 302032         | 568236   | 302011         | 568037   | 301992         | 567858   |
| Lanarkland, road            | SHEs495 |                     |          |                    |          |                |          |                |          |                |          |
| Shaw                        | SHE0016 | 301670              | 567270   | 301878             | 567510   |                |          |                |          |                |          |
| Highmains track             | SHE0017 | 301690              | 567640   | 301608             | 567587   |                |          |                |          |                |          |
| Chapelhill, field           | SHE0018 | 301475              | 567870   | 301383             | 567736   | 301366         | 567711   |                |          |                |          |
| Chapelhill, fence from farm | SHE0019 | 301140              | 567755   | 301165             | 567798   |                |          |                |          |                |          |
| Chapelhill, wall on west    | SHE0020 | 301100              | 567950   | 301026             | 567890   |                |          |                |          |                |          |
| Chapelhill, E edge of wood  | SHE0021 | 300900              | 567905   | 300868             | 567994   |                |          |                |          |                |          |
| Chapelhill, N side of wood  | SHE0022 | 300835              | 568065   | 300772             | 568034   |                |          |                |          |                |          |
| Chapelhill, reservoir       | SHE0023 | 300635              | 568155   | 300666             | 568094   |                |          |                |          |                |          |
| Townfoot                    | SHE0024 | 300445              | 568210   |                    |          |                |          |                |          |                |          |
| Upper Conheath field        | SHE0010 | 300425              | 570230   |                    |          |                |          |                |          |                |          |
| Upper Conheath track        | SHE009  | 300395              | 570280   |                    |          |                |          |                |          |                |          |
| Conheath, field boundary    | SHE0013 | 300345              | 570510   | 300353             | 570516   |                |          |                |          |                |          |
| Conheath, beyond wood       | SHE0012 | 300175              | 570820   |                    |          |                |          |                |          |                |          |
| Conheath, field & wood      | SHE0011 | 300020              | 570710   | 300067             | 570716   |                |          |                |          |                |          |
| Boreland track/hedge        | SHE991  | 301010              | 569145   | 299827             | 570837   | 299801         | 570823   |                |          |                |          |
| Boreland rack offset        | SHE991a |                     |          | 299818             | 570833   | 299787         | 570816   |                |          |                |          |



## Appendix A

## Location of traverses and anomaly minima

*Grid references (all digit for uniqueness) give location to nearest metre from grid origin*

| Location                   | Code    | Start point of line |          | Position of Minima |          |                |          |                |          |                |          |
|----------------------------|---------|---------------------|----------|--------------------|----------|----------------|----------|----------------|----------|----------------|----------|
|                            |         | grid reference      |          | grid reference     |          | grid reference |          | grid reference |          | grid reference |          |
|                            |         | easting             | northing | easting            | northing | easting        | northing | easting        | northing | easting        | northing |
|                            |         | m                   | m        | m                  | m        | m              | m        | m              | m        | m              | m        |
| <b>Cleveland Dyke</b>      |         |                     |          |                    |          |                |          |                |          |                |          |
| Dalskairth fence, SW       | N9917   | 293477              | 572905   |                    |          | 293667         | 572905   |                |          |                |          |
| Dalskairth Grange fence    | N9915   | 293290              | 572965   |                    |          | 293313         | 573073   |                |          |                |          |
| Dalskairth Grange, mid-fld | N9916   | 293250              | 573115   | 293238             | 573051   |                |          |                |          |                |          |
| Dalskairth Gge-Woodfoot    | N9914   | 293570              | 573190   | 293077             | 573056   |                |          |                |          |                |          |
| Hill Wood, Nth off A711    | N9918   | 293000              | 573050   | 292983             | 573069   |                |          |                |          |                |          |
| Railway track              | N0022   | 292915              | 573145   |                    |          | 292916         | 573150   | 292893         | 573096   |                |          |
| Railway track              | N0023   | 292915              | 573145   |                    |          | 292901         | 573066   |                |          |                |          |
| Hills Wood, track north    | N0021   | 292890              | 573170   | 292900             | 573249   | 292892         | 573190   |                |          |                |          |
| Hills Wood, track south    | N0020   | 292890              | 573170   | 292825             | 573132   |                |          |                |          |                |          |
| Lochanhead, by old qy      | LNH195  | 291960              | 571830   |                    |          |                |          |                |          |                |          |
| Lochanhead, A711           | LHH295  | 292420              | 572370   |                    |          |                |          |                |          |                |          |
| Lochanhead, old ry         | LNH395  | 291600              | 571680   | 291836             | 571897   |                |          |                |          |                |          |
| Lochanhead                 | LNH194* | 291600              | 572050   | 291653             | 572103   | 291625         | 572075   | 291618         | 572068   | 291600         | 572050   |
| Lochanhead                 | LNH495* | 291490              | 572130   | 291510             | 572160   | 291500         | 572145   | 291488         | 572127   |                |          |
| Lochanhead Nth fence       | LNH595  | 291330              | 572380   |                    |          |                |          |                |          |                |          |
| Lochanhead, Foreside       | LNH695  | 291150              | 572100   | 291206             | 572246   | 291200         | 572231   | 291191         | 572206   |                |          |
| Lochanhead, Lochfoot rd    | LNH795  | 290800              | 572235   | 290784             | 572384   |                |          |                |          |                |          |
| Lochrutton, Sth, field 1   | LNH9811 | 290564              | 572763   | 290310             | 572622   |                |          |                |          |                |          |
| Lochrutton, south side     | LNH989  | 290532              | 573001   |                    |          |                |          |                |          |                |          |
| Lochrutton, west side      | LNH9810 | 289550              | 573420   | 289550             | 573221   |                |          |                |          |                |          |
| Lochfoot Old Mltry rd      | LNH895  | 288610              | 573400   | 289366             | 573479   |                |          |                |          |                |          |
| Barquhar                   | SH5     | 288300              | 574230   | 288437             | 574385   |                |          |                |          |                |          |
| Braco drain                | SH978   | 287575              | 575405   | 287649             | 575479   | 287657         | 575488   |                |          |                |          |
| Braco, east of house       | SH9813  | 287530              | 575645   | 287548.2           | 575559.4 | 287540.4       | 575596.1 |                |          |                |          |
| Braco, track+field         | SH6     | 287480              | 575688   | 287408             | 575673   |                |          |                |          |                |          |
| Braco, lower field         | SH9811  | 287220              | 575640   | 287396.9           | 575694.1 |                |          |                |          |                |          |

## Appendix A

## Location of traverses and anomaly minima

*Grid references (all digit for uniqueness) give location to nearest metre from grid origin*

| Location                                              | Code              | Start point of line |          | Position of Minima |          |                |          |                |          |                |          |   |
|-------------------------------------------------------|-------------------|---------------------|----------|--------------------|----------|----------------|----------|----------------|----------|----------------|----------|---|
|                                                       |                   | grid reference      |          | grid reference     |          | grid reference |          | grid reference |          | grid reference |          |   |
|                                                       |                   | easting             | northing | easting            | northing | easting        | northing | easting        | northing | easting        | northing |   |
|                                                       |                   | m                   | m        | m                  | m        | m              | m        | m              | m        | m              | m        | m |
| <b>Cleveland Dyke</b>                                 |                   |                     |          |                    |          |                |          |                |          |                |          |   |
| Braco, N side of field<br>(2 different dykes B1 & B3) | SH7* (B1)<br>(B3) | 287292              | 575780   | 287349             | 575760   |                |          |                |          |                |          |   |
|                                                       |                   |                     |          | 287319             | 575765   |                |          |                |          |                |          |   |
| Braco wall                                            | SH979             | 287245              | 575695   | 287359             | 575920   | 287295         | 575798   |                |          |                |          |   |
| Braco, new exposure                                   | SH9710*           | 287260              | 575865   | 287396             | 575909   | 287355         | 575896   |                |          |                |          |   |
| Braco, field by road                                  | SH9812            | 287450              | 576000   | 287325.5           | 575954.7 |                |          |                |          |                |          |   |
| SHAW1/92, W-E                                         | SHAW192           | 287200              | 576000   | 287263             | 576011   |                |          |                |          |                |          |   |
| SHAW2/92, S-N                                         | SHAW292           | 287200              | 576000   | 287219             | 576072   |                |          |                |          |                |          |   |
| longline                                              | longline          |                     |          | 287221             | 576061   |                |          |                |          |                |          |   |
| Rosebank, SW                                          | SK9810            | 287335              | 576360   | 287228.2           | 576353.5 |                |          |                |          |                |          |   |
| Rosebank, north                                       | SK989             | 287350              | 576400   | 287226.5           | 576426.9 |                |          |                |          |                |          |   |
| Rosebank                                              | SK973             | 287370              | 576535   | 287231             | 576495   |                |          |                |          |                |          |   |
| Deil's Wood (above)                                   | SK988             | 287250              | 576650   | 287240.1           | 576649   |                |          |                |          |                |          |   |
| Doons-Deil's Wood                                     | SK987             | 287265              | 576895   | 287245.8           | 576726.1 |                |          |                |          |                |          |   |
| Doons, Sth                                            | SK974             | 286980              | 576875   | 287183             | 576900   |                |          |                |          |                |          |   |
| Doons, E                                              | SK976             | 287070              | 577100   | 287061             | 577031   | 287060         | 577018   |                |          |                |          |   |
| Doons, Nth                                            | SK975             | 287070              | 577100   | 286973             | 577124   | 286820         | 577162   | 286793         | 577169   | 286769         | 577175   |   |
| Holm Moor                                             | SK1/95            | 286820              | 577170   | 286809             | 577159   | 286800         | 577150   |                |          |                |          |   |
| Holm Moor                                             | SK2/95            | 286875              | 577350   | 286632             | 577257   |                |          |                |          |                |          |   |
| Skeoch/Holm Moor                                      | SK972             | 286790              | 577510   | 286573             | 577476   |                |          |                |          |                |          |   |
| Skeoch, field wall SE                                 | SK971             | 286240              | 577680   | 286530             | 577685   | 286482         | 577684   |                |          |                |          |   |
| Skeoch, along road                                    | SK194             | 286015              | 576831   | 286285             | 577933   |                |          |                |          |                |          |   |
| Skeoch, road detail                                   | SK194a            | 286400              | 578020   | 286278             | 577902   |                |          |                |          |                |          |   |
| Skeoch, road repeat                                   | SK194rpt          | 286340              | 577950   | 286263             | 577887   |                |          |                |          |                |          |   |
| Skeoch, in field                                      | SK2/94            | 286190              | 577935   | 286204             | 577949   | 286190         | 577935   |                |          |                |          |   |
| Skeoch, behind 1st wall                               | SK991             | 286105              | 578015   | 286093             | 578011   | 286070         | 578003   |                |          |                |          |   |
| Skeoch, 50m SE of 2 wall                              | SK995             | 286125              | 578155   | 286034             | 578070   | 286019         | 578056   |                |          |                |          |   |

## Appendix A

## Location of traverses and anomaly minima

*Grid references (all digit for uniqueness) give location to nearest metre from grid origin*

| Location                   | Code     | Start point of line |          | Position of Minima |          |                |          |                |          |                |          |
|----------------------------|----------|---------------------|----------|--------------------|----------|----------------|----------|----------------|----------|----------------|----------|
|                            |          | grid reference      |          | grid reference     |          | grid reference |          | grid reference |          | grid reference |          |
|                            |          | easting             | northing | easting            | northing | easting        | northing | easting        | northing | easting        | northing |
|                            |          | m                   | m        | m                  | m        | m              | m        | m              | m        | m              | m        |
| <b>Cleveland Dyke</b>      |          |                     |          |                    |          |                |          |                |          |                |          |
| Skeoch, SE side of wood    | SK993    | 286100              | 578195   |                    |          |                |          |                |          |                |          |
| Skeoch, Sth side of wall 2 | SK992    | 277915              | 578020   | 286030             | 578126   | 285977         | 578080   |                |          |                |          |
| Skeoch, NW side of wood    | SK994    | 286265              | 578325   |                    |          |                |          |                |          |                |          |
| Skeoch, l exp, 210         | SK394*   | 286065              | 578200   | 286230             | 578329   | 286112         | 578237   |                |          |                |          |
| & 305                      | SK394r*  |                     |          | 286227             | 578326   | 286112         | 578237   | 286045         | 578185   |                |          |
| Skeoch, 30m NW wall 2      | SK996    | 286035              | 578198   | 285935             | 578110   | 286040         | 578198   |                |          |                |          |
| Skeoch, lower exp check    | SK977*   | 286057              | 578200   | 286213             | 578341   | 286103         | 578242   |                |          |                |          |
| Skeoch, across l, exp      | SK978*   | 286005              | 578205   | 286131             | 578299   | 286123         | 578294   | 286117         | 578289   | 286065         | 578250   |
|                            |          |                     |          | 286207             | 578343   |                |          |                |          |                |          |
| Skeoch, upper exp          | SK4/94*  |                     |          | 286134             | 578423   |                |          |                |          |                |          |
| Skeoch, by stream          | SK3/95   | 285660              | 578570   | 285799             | 578784   |                |          |                |          |                |          |
| Skeoch, by wall            | SK4/95   | 285650              | 579225   | 285611             | 578978   |                |          |                |          |                |          |
| Bishop Forest Hill         | SK5/95*  | 285235              | 579560   | 285293             | 579622   |                |          |                |          |                |          |
| Marglolly, The Forest      | MU987    | 284487              | 580199   | 284412.8           | 580152.6 |                |          |                |          |                |          |
| Marglolly, track to gate   | MU989    | 284487              | 580199   | 284357             | 580206   | 284320         | 580208   | 284294.8       | 580209.1 | 284252         | 580211   |
| Marglolly, from stream     | MU986    | 284315              | 580445   |                    |          |                |          |                |          |                |          |
| Marglolly Bridge, long     | marglong |                     |          | 284145             | 580253   |                |          |                |          |                |          |
| Marglolly Bridge, dtl      | MGL94    | 284200              | 580330   | 284138             | 580227   |                |          |                |          |                |          |
| Muil                       | MU4      | 283678              | 580358   | 283658             | 580549   | 283656         | 580567   | 283653         | 580592   |                |          |
| Muil                       | MU3      | 283125              | 580650   | 283239             | 580712   | 283217         | 580700   | 283193         | 580687   |                |          |
| Muil, along wd & wll       | MU2      | 283880              | 580085   |                    |          |                |          |                |          |                |          |
| Muil, along wall >MU2      | MU988    | 283120              | 580640   | 282958.2           | 580716   |                |          |                |          |                |          |
| Muil                       | MU5      | 282980              | 580005   | 282932             | 580686   |                |          |                |          |                |          |
| Muil, wall, 825            | MU94     | 282600              | 580050   | 282565             | 580448   |                |          |                |          |                |          |
| Muil outcrop               | MU976*   | 281710              | 580845   | 281710             | 580845   | 281709         | 580860   |                |          |                |          |
| Darngarroch, east          | DN972*   | 280360              | 581580   | 280357             | 581627   | 280355         | 581645   | 280354         | 581672   | 280353         | 581680   |

## Appendix A

## Location of traverses and anomaly minima

*Grid references (all digit for uniqueness) give location to nearest metre from grid origin*

| Location                   | Code     | Start point of line |          | Position of Minima |          |                |          |                |          |                |          |
|----------------------------|----------|---------------------|----------|--------------------|----------|----------------|----------|----------------|----------|----------------|----------|
|                            |          | grid reference      |          | grid reference     |          | grid reference |          | grid reference |          | grid reference |          |
|                            |          | easting             | northing | easting            | northing | easting        | northing | easting        | northing | easting        | northing |
|                            |          | m                   | m        | m                  | m        | m              | m        | m              | m        | m              | m        |
| <b>Cleveland Dyke</b>      |          |                     |          |                    |          |                |          |                |          |                |          |
| Darngarroch outcrop        | DN971*   | 280285              | 581600   | 280293             | 581606   | 280279         | 581596   | 280269         | 581588   |                |          |
| Craigdasher Hill Sth       | CRA988   | 279200              | 582310   | 279981.4           | 582725.5 |                |          |                |          |                |          |
| Craigdasher Hill East      | CRA989   | 279980              | 582685   | 279969.6           | 582744.1 |                |          |                |          |                |          |
| Craigdasher NW wall        | CRA977   | 279450              | 583007   | 279447             | 582982   | 279406         | 582875   |                |          |                |          |
| Craigdasher NW wood        | CRA976   | 279450              | 583007   | 279450             | 583030   | 279450         | 583072   |                |          |                |          |
| Craigdasher, old wall      | CRA975   | 279320              | 583315   | 279258             | 583146   |                |          |                |          |                |          |
| Craigdasher, wall by trk   | CRA973   | 279025              | 583140   | 279084             | 583294   | 279077         | 583275   |                |          |                |          |
| Letterick by stream        | CRA974   | 278950              | 583190   | 279027             | 583336   |                |          |                |          |                |          |
| Craigenputtock, rd         | CRA1/95  | 277880              | 582210   | 278963             | 583371   | 278954         | 583362   |                |          |                |          |
| Craigenputtock field       | CRA2/95  | 278970              | 583380   | 279018             | 583437   | 278989         | 583403   |                |          |                |          |
| Craigenputtock, track      | CRA971   | 278710              | 583210   | 278828             | 583475   |                |          |                |          |                |          |
| Craigenputtock, lower wall | CRA994   | 278645              | 583410   | 278599             | 583390   |                |          |                |          |                |          |
| Craigenputtock, wall 2-    | CRA993   | 278395              | 583395   | 278522             | 583453   | 278436         | 583414   |                |          |                |          |
| Craigenputtock, wall 2+    | CRA972   | 278905              | 583605   | 278680             | 583514   |                |          |                |          |                |          |
| Castramon, frm wall corner | CRA991   | 278260              | 583305   | 278382             | 583451   |                |          |                |          |                |          |
| Castramon, slopes by crag  | CRA992*  | 278230              | 583522   | 278173             | 583431   | 278226         | 583516   |                |          |                |          |
| Castramon Hill             | CRA9810  | 278770              | 584232   | 278159.9           | 583586.7 | 278096         | 583540   | 278054         | 583516   | 278022         | 583497   |
| Craigenvey Moor            | CRA001   | 277915              | 584145   | 278005             | 583501   | 278000         | 583538   | 277991         | 583608   |                |          |
| Craigenvey Moor            | CRA002   | 277700              | 583350   |                    |          | 277651         | 583697   |                |          |                |          |
| Craigenvey Moor            | CRA003   | 277609              | 583950   |                    |          |                |          |                |          |                |          |
| Craigenvey                 | LU11/11A | 277323              | 584315   |                    |          |                |          |                |          |                |          |
| Doddies Brae (LU0014)      | LU0016   | 278265              | 584625   |                    |          |                |          |                |          |                |          |
| Shillinglands              | LU13     | 277750              | 584970   | 277745             | 584970   | 277705         | 584796   |                |          |                |          |
| Shillinglands              | LU14     | 277700              | 585280   | 277525             | 585039   |                |          |                |          |                |          |
| Shillinglands              | LU15*    | 277425              | 585115   | 277413             | 585085   |                |          |                |          |                |          |
| Shillinglands              | LU12     | 277322              | 585150   | 277306             | 585105   |                |          |                |          |                |          |

## Appendix A

## Location of traverses and anomaly minima

*Grid references (all digit for uniqueness) give location to nearest metre from grid origin*

| Location              | Code     | Start point of line |          | Position of Minima |          |                |          |                |          |                |          |   |
|-----------------------|----------|---------------------|----------|--------------------|----------|----------------|----------|----------------|----------|----------------|----------|---|
|                       |          | grid reference      |          | grid reference     |          | grid reference |          | grid reference |          | grid reference |          |   |
|                       |          | easting             | northing | easting            | northing | easting        | northing | easting        | northing | easting        | northing |   |
|                       |          | m                   | m        | m                  | m        | m              | m        | m              | m        | m              | m        | m |
| <b>Cleveland Dyke</b> |          |                     |          |                    |          |                |          |                |          |                |          |   |
| Loch Urr Hill field   | LU972    | 276825              | 585165   | 276913             | 585345   |                |          |                |          |                |          |   |
| Loch Urr Hill wood    | LU971    | 276525              | 585350   | 276658             | 585591   |                |          |                |          |                |          |   |
| Lochurr West          | LU10     | 276175              | 585350   | 276310             | 585615   | 276299         | 585594   |                |          |                |          |   |
| Lochurr West          | LU9      | 275630              | 585340   | 275952             | 585674   |                |          |                |          |                |          |   |
| Lochurr West          | LU4/93   | 275270              | 585800   | 275258             | 585837   |                |          |                |          |                |          |   |
| Lochurr West          | LU3/93   | 274970              | 585700   | 275120             | 585850   |                |          |                |          |                |          |   |
| Craigmuie Moor E      | Lurrlong |                     |          | 274932             | 585891   |                |          |                |          |                |          |   |
| Craigmuie Moor E      | LU1a/92  | 274950              | 585800   | 274904             | 585890   | 274887         | 585923   |                |          |                |          |   |
| Craigmuie Moor E      | LUrpt    | 274920              | 585830   | 274882             | 585904   | 274877         | 585914   |                |          |                |          |   |
| Craigmuie Moor E      | LU8      | 274765              | 585817   | 274784             | 585953   |                |          |                |          |                |          |   |
| Craigmuie Moor E      | LU2/93   | 274580              | 586100   | 274580             | 585868   |                |          |                |          |                |          |   |
| Craigmuie Moor E      | LUG50    | 274413              | 585896   | 274415             | 585898   |                |          |                |          |                |          |   |
| Craigmuie Moor E      | LUG30    | 274400              | 585912   | 274403             | 585915   |                |          |                |          |                |          |   |
| Craigmuie Moor E      | LUG20    | 274394              | 585920   | 274415             | 585938   |                |          |                |          |                |          |   |
| Craigmuie Moor E      | LUG15*   | 274391              | 585923   | 274419             | 585946   |                |          |                |          |                |          |   |
| Craigmuie Moor E      | LUG25p   | 274410              | 585939   | 274413             | 585936   |                |          |                |          |                |          |   |
| Craigmuie Moor E      | LUG10    | 274388              | 585927   | 274428             | 585961   |                |          |                |          |                |          |   |
| Craigmuie Moor E      | LUG0*    | 274382              | 585935   | 274424             | 585970   | 274411         | 585959   |                |          |                |          |   |
| Craigmuie Moor E      | LUG-20   | 274386              | 585950   | 274433             | 585989   | 274415         | 585974   |                |          |                |          |   |
| Craigmuie Moor E      | LUG-30   | 274362              | 585958   | 274408             | 585997   | 274390         | 585981   |                |          |                |          |   |
| Craigmuie Moor E      | LUG-40   | 274356              | 585966   | 274402             | 586005   | 274375         | 585982   |                |          |                |          |   |
| Craigmuie Moor E      | LUGbase  | 274382              | 585935   | 274350             | 585973   |                |          |                |          |                |          |   |
| Craigmuie Moor E      | LU5      | 274286              | 586025   | 274332             | 586064   | 274238         | 585985   |                |          |                |          |   |
| Craigmuie Moor E      | LU6      | 274186              | 586025   | 274165             | 585991   | 274138         | 585949   |                |          |                |          |   |
| Craigmuie Moor E      | LU7      | 274201              | 586107   | 274201             | 585965   | 274201         | 585992   |                |          |                |          |   |
| N-S fence             | CR3/93   | 274100              | 586400   | 274100             | 586015   | 274100         | 586040   |                |          |                |          |   |





## Appendix A

## Location of traverses and anomaly minima

*Grid references (all digit for uniqueness) give location to nearest metre from grid origin*

| Location                 | Code     | Start point of line |          | Position of Minima |          |                |          |                |          |                |          |
|--------------------------|----------|---------------------|----------|--------------------|----------|----------------|----------|----------------|----------|----------------|----------|
|                          |          | grid reference      |          | grid reference     |          | grid reference |          | grid reference |          | grid reference |          |
|                          |          | easting             | northing | easting            | northing | easting        | northing | easting        | northing | easting        | northing |
|                          |          | m                   | m        | m                  | m        | m              | m        | m              | m        | m              | m        |
| <b>Cleveland Dyke</b>    |          |                     |          |                    |          |                |          |                |          |                |          |
| Craigmuie N              | CM7      | 273380              | 586790   | 273409             | 586830   | 273399         | 586816   |                |          |                |          |
| A702                     | CFrd/92  | 273390              | 587920   | 273341             | 587926   |                |          |                |          |                |          |
| Castlefairn              | CF9      | 273435              | 587040   | 273316             | 587056   | 273244         | 587065   |                |          |                |          |
| Castlefairn              | CF8      | 273165              | 586975   | 273290             | 587057   | 273286         | 587048   |                |          |                |          |
| Castlefairn              | CF7      | 273083              | 587105   | 273230             | 587117   |                |          |                |          |                |          |
| Castlefairn              | CF6      | 273108              | 587238   | 273184             | 587212   |                |          |                |          |                |          |
| Castlefairn              | CF4      | 273104              | 587328   | 273228             | 587292   | 273179         | 587312   |                |          |                |          |
| Castlefairn              | CF5      | 273151              | 587382   | 273334             | 587315   | 273299         | 587328   | 273266         | 587340   | 273231         | 587353   |
| Castlefairn              | CF1/93   | 273250              | 587375   | 273332             | 587375   | 273275         | 587375   |                |          |                |          |
| Castlefairn              | CF2/93   | 273263              | 587423   | 273333             | 587423   | 273282         | 587423   |                |          |                |          |
| Castlefairn              | CF3/93   | 273140              | 587625   | 273356             | 587599   |                |          |                |          |                |          |
| Shield Burn              | MG11/93  | 273540              | 587730   | 273327             | 587539   | 273246         | 587466   |                |          |                |          |
| Shield Burn              | MG8/93   | 273500              | 587800   | 273496             | 587792   | 273463         | 587718   | 273441         | 587668   |                |          |
| Shield Burn              | MG10/93* | 273400              | 587850   | 273370             | 587798   | 273395         | 587841   |                |          |                |          |
| Shield Burn              | MG9/93*  | 273340              | 587835   | 273343             | 587840   | 273336         | 587829   | 273328         | 587817   |                |          |
| Shield Burn              | MG7/93*  | 273290              | 587970   | 273292             | 587981   | 273289         | 587965   |                |          |                |          |
| Shield Burn              | MG6/93*  | 273150              | 588000   | 273154             | 588001   | 273133         | 587994   |                |          |                |          |
| Glecrosh Hill, by fence  | MG5A     | 272830              | 588460   | 272856             | 588348   | 272850         | 588375   |                |          |                |          |
| Glecrosh Hill            | MG5/93*  | 272825              | 588450   | 272771             | 588405   | 272757         | 588393   |                |          |                |          |
| Glecrosh Hill, over exp  | MG4A*    | 272710              | 588460   | 272710             | 588460   | 272696         | 588446   |                |          |                |          |
| Glecrosh Hill, Sth of wd | MG4/93   | 272550              | 588470   | 272591             | 588519   |                |          |                |          |                |          |
| Minnygryle               | MG3/93   | 272286              | 588650   | 272324             | 588736   |                |          |                |          |                |          |
| Minnygryle               | MG2/92   | 271750              | 588950   | 271852             | 589009   | 271792         | 588974   |                |          |                |          |
| Minnygryle               | MG1/92   | 271550              | 589200   | 271554             | 589207   | 271561         | 589222   |                |          |                |          |
| Troston                  | TR1/92   | 271320              | 589580   | 271414             | 589605   |                |          |                |          |                |          |
| Troston                  | TR2/92   | 271160              | 589920   | 271141             | 589850   |                |          |                |          |                |          |

## Appendix A

## Location of traverses and anomaly minima

*Grid references (all digit for uniqueness) give location to nearest metre from grid origin*

| Location                  | Code      | Start point of line |          | Position of Minima |          |                |          |                |          |                |          |
|---------------------------|-----------|---------------------|----------|--------------------|----------|----------------|----------|----------------|----------|----------------|----------|
|                           |           | grid reference      |          | grid reference     |          | grid reference |          | grid reference |          | grid reference |          |
|                           |           | easting             | northing | easting            | northing | easting        | northing | easting        | northing | easting        | northing |
|                           |           | m                   | m        | m                  | m        | m              | m        | m              | m        | m              | m        |
| <b>Cleveland Dyke</b>     |           |                     |          |                    |          |                |          |                |          |                |          |
| Troston                   | TR3/92    | 270800              | 590050   | 270814             | 590097   |                |          |                |          |                |          |
| Troston                   | TR4/92    | 270370              | 590350   | 270370             | 590346   |                |          |                |          |                |          |
| Troston, by loch          | TRlch/92  | 270000              | 50300    |                    |          |                |          |                |          |                |          |
| Troston                   | TR5/(N)93 |                     |          |                    |          |                |          |                |          |                |          |
| Troston                   | TR5(S)/92 | 269950              | 590500   |                    |          |                |          |                |          |                |          |
| Troston                   | TR6/93    | 269900              | 591030   |                    |          | 269977         | 591017   |                |          |                |          |
| Troston                   | TR6A/93   |                     |          |                    |          |                |          |                |          |                |          |
| Fingland                  | Fing/92   | 269060              | 591010   |                    |          |                |          |                |          |                |          |
| B729                      | B729/92   | 269970              | 591350   | 269919             | 591289   | 269941         | 591316   |                |          |                |          |
| Forest                    | Forest/92 | 269800              | 591400   | 269882             | 591543   | 269872         | 591526   | 269857         | 591500   |                |          |
| Auchenstroan Fst, track 1 | F992      | 270095              | 591840   | 269797             | 591812   |                |          |                |          |                |          |
| Auchenstroan Fst, track 2 | F993      | 269565              | 592090   | 269902             | 592129   | 269842         | 592125   |                |          |                |          |
| Auchenstroan Fst, N wall  | F994      | 269515              | 592380   | 269904             | 592407   | 269729         | 592395   |                |          |                |          |
| Craiglirian Crag          | F995      | 269950              | 592600   | 269784             | 592562   |                |          |                |          |                |          |
| Carroch, east             | Corn983   | 267370              | 591695   |                    |          |                |          |                |          |                |          |
| Carroch, west             | Corn985   | 267370              | 591705   |                    |          |                |          |                |          |                |          |
| Carroch Hill new fence    | CORN0010  | 266690              | 591840   |                    |          |                |          |                |          |                |          |
| Cornharrow-Carroch        | CORN009   | 266540              | 592160   | 266905             | 592468   | 266836         | 592392   | 266798         | 592349   | 266763         | 592318   |
| Cornharrow, east          | Corn984   | 266715              | 592720   | 266653.9           | 592661   | 266625.1       | 592633.2 | 266563.9       | 592574.1 |                |          |
| Cornharrow, long line     | Corn1     |                     |          |                    |          |                |          |                |          |                |          |
| Cornharrow, offset        | Corn2     | 266490              | 592775   | 266517             | 592817   |                |          |                |          |                |          |
| Cornharrow, west, 2+      | Corn982a  | 266580              | 592820   | 266565.3           | 592810.5 |                |          |                |          |                |          |
| Manquhill Hill east       | Corn986   | 266360              | 593910   | 266177.3           | 593714.8 | 266063.4       | 593667.2 |                |          |                |          |
| Southern Upland Way       | Corn988   | 265710              | 593730   | 265726.4           | 594158.6 | 265732         | 594175   |                |          |                |          |
| Manquhill Hill west       | Corn987   | 265520              | 594390   | 265450.9           | 594252.7 | 265437         | 594204.7 |                |          |                |          |
| Auchrae Forest wall       | AC983     | 265460              | 595090   | 265237.3           | 594579.6 | 265203.2       | 594543.1 |                |          |                |          |

## Appendix A

## Location of traverses and anomaly minima

*Grid references (all digit for uniqueness) give location to nearest metre from grid origin*

| Location                     | Code   | Start point of line |          | Position of Minima |          |                |          |                |          |                |          |
|------------------------------|--------|---------------------|----------|--------------------|----------|----------------|----------|----------------|----------|----------------|----------|
|                              |        | grid reference      |          | grid reference     |          | grid reference |          | grid reference |          | grid reference |          |
|                              |        | easting             | northing | easting            | northing | easting        | northing | easting        | northing | easting        | northing |
|                              |        | m                   | m        | m                  | m        | m              | m        | m              | m        | m              | m        |
| <b>Cleveland Dyke</b>        |        |                     |          |                    |          |                |          |                |          |                |          |
| Auchrae Forest track S       | AC981  | 265255              | 595305   |                    |          |                |          |                |          |                |          |
| Auchrae Forest track N       | AC982  | 265255              | 595305   |                    |          |                |          |                |          |                |          |
| Auchrae Forest track 2       | AC985  | 266100              | 596350   | 265495.9           | 596148.2 | 265463.5       | 596117   |                |          |                |          |
| Auchrae along road           | AC984  | 265130              | 596495   | 265142             | 596527.9 |                |          |                |          |                |          |
| Auchrae west of road         | AC986  | 264900              | 596430   |                    |          |                |          |                |          |                |          |
| Corlae Forest road           | WK971  | 265860              | 597700   |                    |          |                |          |                |          |                |          |
| Corlae Forest track          | WK972  | 267120              | 598130   |                    |          |                |          |                |          |                |          |
| W of Ken/Corlae              | WK1    | 265860              | 597700   |                    |          |                |          |                |          |                |          |
| Corlae, east of rd in forest | WK991  | 266055              | 597560   | 265779             | 597329   |                |          |                |          |                |          |
| Corlae road Sth              | WK974  | 265820              | 597660   |                    |          |                |          |                |          |                |          |
| Corlae, bog W of road        | WK973  | 265540              | 598035   | 265545             | 597647   |                |          |                |          |                |          |
| Corlae, wall E of river      | WK992  | 265470              | 597605   | 265498             | 597876   |                |          |                |          |                |          |
| Corlae, wall W of river      | WK993  | 265422              | 597920   | 265430             | 597979   |                |          |                |          |                |          |
| Nether Holm                  | WK2    | 265475              | 598650   | 265466             | 598433   | 265464         | 598405   |                |          |                |          |
| Dodd Hill                    | WK3*   | 265282              | 598890   | 265170             | 598806   |                |          |                |          |                |          |
| Upper Holm                   | WK4    | 265170              | 599215   | 265061             | 599164   |                |          |                |          |                |          |
| Upper Holm, from hse         | WK9810 | 265500              | 599395   |                    |          |                |          |                |          |                |          |
| Holm Burn                    | WK986  | 265040              | 599400   |                    |          |                |          |                |          |                |          |
| Alcherry Cleugh Burn         | WK985  | 265040              | 599400   |                    |          | 264949.9       | 599336.9 |                |          |                |          |
| Enclosure to forest          | WK9811 | 265280              | 599355   |                    |          |                |          |                |          |                |          |
| East from forest fence       | WK9812 | 265425              | 599615   |                    |          |                |          |                |          |                |          |
| Sheepfold to forest          | WK987  | 264825              | 599555   | 265215.2           | 599664.4 |                |          |                |          |                |          |
| East from ride               | WK988  | 265110              | 599900   | 265081.5           | 599890.7 |                |          |                |          |                |          |
| Midrig, above trees          | WK989* | 264915              | 600065   | 264940.9           | 600267.6 |                |          |                |          |                |          |
| Alhang summit                | WS974  | 263930              | 600910   | 264104             | 601053   |                |          |                |          |                |          |
| Alhang, NW slopes            | WS973  | 263380              | 601295   | 263508             | 601442   |                |          |                |          |                |          |

## Appendix A

## Location of traverses and anomaly minima

*Grid references (all digit for uniqueness) give location to nearest metre from grid origin*

| Location                   | Code    | Start point of line |          | Position of Minima |          |                |          |                |          |                |          |   |
|----------------------------|---------|---------------------|----------|--------------------|----------|----------------|----------|----------------|----------|----------------|----------|---|
|                            |         | grid reference      |          | grid reference     |          | grid reference |          | grid reference |          | grid reference |          |   |
|                            |         | easting             | northing | easting            | northing | easting        | northing | easting        | northing | easting        | northing |   |
|                            |         | m                   | m        | m                  | m        | m              | m        | m              | m        | m              | m        | m |
| <b>Cleveland Dyke</b>      |         |                     |          |                    |          |                |          |                |          |                |          |   |
| Millaneoch/Alhang Col      | WS972   | 263165              | 601500   | 263215             | 601556   |                |          |                |          |                |          |   |
| Windy Standard fence       | WS971   | 262420              | 601310   | 262729             | 601972   |                |          |                |          |                |          |   |
| W. Millaneoch Hill         | WS9810  | 262060              | 602470   | 262118             | 602454.5 |                |          |                |          |                |          |   |
| Water of Deugh track       | WS977   | 262920              | 602940   | 261964             | 602776   |                |          |                |          |                |          |   |
| Jedburgh Knees outcrop     | WS976*  | 261505              | 602992   | 261550             | 602990   |                |          |                |          |                |          |   |
| Jedburgh Knees ride        | WS975   | 261560              | 603065   | 261520             | 603010   |                |          |                |          |                |          |   |
| Calf Knees ride            | WS978   | 261315              | 603265   | 261278             | 603240   | 261257         | 603226   |                |          |                |          |   |
| Gallow Rig ride 1          | WS979   | 260710              | 603965   | 260772             | 603997   |                |          |                |          |                |          |   |
| Gallow Rig Ride 2          | WS9811  | 260595.6            | 604305.4 | 260625.1           | 604311.1 |                |          |                |          |                |          |   |
| Main Track, G Rig Moss     | WS9815  | 260150              | 604320   |                    |          | 260306         | 604348   |                |          |                |          |   |
| Gallow Rig Moss ride       | WS9814  | 260500              | 604665   | 260233.7           | 604506.8 |                |          |                |          |                |          |   |
| Glenlee, SE wall           | WS9813  | 260622              | 604625   |                    |          |                |          |                |          |                |          |   |
| Glenlee, NE track          | WS9812  | 260565              | 604700   |                    |          |                |          |                |          |                |          |   |
| Pencloe Forest, ride 1     | MN994   | 260040              | 605360   |                    |          |                |          |                |          |                |          |   |
| Pencloe Forest, ride 2     | MN996   | 260305              | 605220   |                    |          | 260600         | 605220   |                |          |                |          |   |
| Pencloe Forest, Nth wall   | MN995   | 260305              | 605220   | 260414             | 605586   |                |          |                |          |                |          |   |
| Glenhastel Burn, side strm | MN993*  | 259770              | 606230   | 259757             | 606222   |                |          |                |          |                |          |   |
| Monquhill track to farm    | MN981   | 259325              | 606990   | 259223.4           | 606928.3 |                |          |                |          |                |          |   |
| Monquhill, new track       | MN981a  | 259060              | 606790   |                    |          |                |          |                |          |                |          |   |
| Monquhill, NE fence        | MN982   | 259310              | 606990   |                    |          |                |          |                |          |                |          |   |
| Manquhill, NW bndy fence   | DL9913  | 258930              | 606890   | 259109             | 607170   |                |          |                |          |                |          |   |
| Small Burn-Connel Burn     | DL9910  | 258335              | 607115   |                    |          |                |          |                |          |                |          |   |
| Polga Burn in steam by ex  | DL9912* | 257500              | 607595   | 257500             | 607595   |                |          |                |          |                |          |   |
| Polga Burn, north bank     | DL9911  | 258347              | 607885   | 257471             | 607635   | 257591         | 607724   |                |          |                |          |   |
| Benty Cowan Hill           | DL984   | 257411.2            | 607898.4 | 257482.1           | 607953.8 |                |          |                |          |                |          |   |
| Chang Hill, SE             | DL983   | 256820              | 607940   | 257061             | 608189.6 |                |          |                |          |                |          |   |

## Appendix A

## Location of traverses and anomaly minima

Grid references (all digit for uniqueness) give location to nearest metre from grid origin

| Location                    | Code    | Start point of line |          | Position of Minima |                |                |          |                |          |                |          |
|-----------------------------|---------|---------------------|----------|--------------------|----------------|----------------|----------|----------------|----------|----------------|----------|
|                             |         | grid reference      |          | grid reference     |                | grid reference |          | grid reference |          | grid reference |          |
|                             |         | easting             | northing | easting            | northing       | easting        | northing | easting        | northing | easting        | northing |
|                             |         | m                   | m        | m                  | m              | m              | m        | m              | m        | m              | m        |
| <b>Cleveland Dyke</b>       |         |                     |          |                    |                |                |          |                |          |                |          |
| Chang Hill, NW              | DL982   | 256890              | 608840   | 256425             | 608472.6       |                |          |                |          |                |          |
| Catlock Burn                | DL997   | 256235              | 608540   |                    |                |                |          |                |          |                |          |
| slope SE of Crocradle Burn  | DL998   | 256260              | 608475   | 256349             | 608531         |                |          |                |          |                |          |
| SE of Crocradle Burn        | DL996   | 256230              | 608540   |                    |                | 256484         | 608727   | 256397         | 608704   | 256294         | 608617   |
| Crocradle Burn, NW bank     | DL995   | 256313              | 608790   |                    |                | 256170         | 608665   | 255935         | 608497   | 255875         | 608462   |
| Dalleagles Sheepfold        | DL981   | 256980              | 609620   |                    |                | 256777         | 609386   | 256724         | 609326   |                |          |
| Rig Hill, south fence       | DL001   | 256653              | 609245   | 255582             | 608347         | 255841         | 608564   |                |          |                |          |
| Knockburnie Burn bank       | DL002   | 255520              | 608360   | 255547             | 608382         | 255531         | 608370   |                |          |                |          |
| Polmath Burn, by stream     | DL004*  | 254890              | 609300   | 254879             | 609246         | 254876         | 609236   |                |          |                |          |
| Polmath Burn, forest fence  | DL003-s | 254900              | 609110   | 254947             | 608467         | 254934         | 608536   | 254926         | 608575   | 254917         | 608619   |
| Polmath Burn, forest fence  | DL003-n | 254900              | 609110   | 254888             | 609148         | 254887         | 609031   | 254874         | 609191   | 254857         | 609243   |
| <b>Other Tertiary dykes</b> |         |                     |          |                    |                |                |          |                |          |                |          |
| Kello Water                 | K1*     | 268680              | 609180   |                    |                |                |          |                |          |                |          |
| AftonWater                  | AW1     | 261360              | 611400   |                    |                |                |          |                |          |                |          |
| Dalleagles Burn (AW7)       | DL999*  | 257300              | 609190   | <i>p257252</i>     | <i>p609277</i> |                |          |                |          |                |          |
| Mossdale                    | M001*   | 249350              | 604015   | <i>p249398</i>     | <i>p603962</i> |                |          |                |          |                |          |
| Dalgig Burn                 | D002    | 255755              | 612985   | 255748             | 613035         |                |          |                |          |                |          |
| Dalgig, field & track       | D001    | 255760              | 613080   | 255840             | 613031         |                |          |                |          |                |          |
| Vennel 2                    | V002    |                     |          | 272500             | 615100         |                |          |                |          |                |          |
| Vennel 1                    | V001*   |                     |          | 272800             | 615000         |                |          |                |          |                |          |
