# Supplementary material
Source: publisher figshare collection journal article supplement (https://geolsoc.figshare.com/articles/dataset/_/3454568)
Supplement: Supplementary file 5 [file 1]

## Appendix E: Geochemical Data

### 1. Procedures

#### 1.1 General

The samples were crushed in a Tema swing mill grinder and then dissolved with hydrofluoric and perchloric acids and also by fusion with lithium metaborate and analysed by ICP-AES. The elements measured included: Si, Al, Fe, Mg, Ca, Na, K, Ti, P, Mn (quoted as weight per cent (wt%) oxides; Ba, Co, Cr, Cu, Li, Nb, Ni, Sc, Sr, V, Y, Zn & Zr (quoted as parts per million (ppm) element).

Precision for the measurement of the major elements (notably Si) was improved by the use of internal standardisation. Accuracy was monitored by the analysis of internal laboratory and international reference materials.

#### 1.2 HF digestion of the sample

0.2 g of the powdered sample was then dissolved in 6 ml of HF and HClO<sub>4</sub> (2:1 mixture). This was then evaporated to dryness, cooled and dissolved in 20 ml of 10% HNO<sub>3</sub>. This solution was analysed by ICP-AES for Na, K, Ti, P, Mn, Ba, Co, Cr, Cu, Li, Ni, Pb, Sc, Sr, V & Zn.

#### 1.3 Lithium metaborate fusion

0.2 g of powdered sample was weighed into a graphite crucible and 1.0 g of LiBO<sub>2</sub> added. The powders were carefully mixed and fused at 900 °C for 20 minutes. The resulting mixture was dissolved in 200 ml of cold 5% nitric acid. Ga is added to the flux to act as an internal standard to achieve an instrumental precision of better than 1% for the major elements. This solution was then analysed by ICP-AES for Si, Al, Fe, Mg, Ca, & Zr.

#### 1.4 Detection limits

Realistic working detection limits are quoted below. These values are an opinion based on analysis of many Certified International Reference materials. It is possible to quote 'detection limits' based on instrumental detection limits and dilution of the sample prior to analysis. This gives much lower detection limits but does not take into account sample preparation problems, longer term drift of instruments, etc.

ICP-AES Working detection limits for the trace elements:  
µg/g (ppm)

|    |    |    |    |    |    |    |    |   |    |    |
|----|----|----|----|----|----|----|----|---|----|----|
| Ba | Co | Cr | Cu | Li | Ni | Sc | Sr | V | Zn | Zr |
| 5  | 2  | 2  | 2  | 2  | 4  | 2  | 2  | 2 | 2  | 4  |

## Appendix E: Geochemical Data

### 2 – Major Oxides

*raw values (values recalculated for 100% total oxides used for plots)*

|                                   | code  | SiO <sub>2</sub><br>wt % | Al <sub>2</sub> O <sub>3</sub><br>wt % | Fe <sub>2</sub> O <sub>3</sub><br>wt % | MgO<br>wt % | CaO<br>wt % | Na <sub>2</sub> O<br>wt % | K <sub>2</sub> O<br>wt % | TiO <sub>2</sub><br>wt % | P <sub>2</sub> O <sub>5</sub><br>wt % | MnO<br>wt % |
|-----------------------------------|-------|--------------------------|----------------------------------------|----------------------------------------|-------------|-------------|---------------------------|--------------------------|--------------------------|---------------------------------------|-------------|
| <b>Cleveland Dyke Sectors</b>     |       |                          |                                        |                                        |             |             |                           |                          |                          |                                       |             |
| <b>East of River Nith<br/>ERN</b> | CD39  | 56.07                    | 13.35                                  | 11.11                                  | 4.25        | 6.91        | 2.73                      | 1.87                     | 1.16                     | 0.22                                  | 0.17        |
|                                   | CD41  | 57.26                    | 13.41                                  | 11.12                                  | 4.24        | 6.90        | 2.75                      | 1.89                     | 1.17                     | 0.22                                  | 0.18        |
|                                   | CD88  | 54.68                    | 13.43                                  | 11.93                                  | 4.50        | 7.52        | 2.49                      | 1.65                     | 1.23                     | 0.25                                  | 0.19        |
|                                   | CD101 | 56.93                    | 13.55                                  | 11.78                                  | 4.40        | 7.14        | 2.72                      | 1.27                     | 1.28                     | 0.16                                  | 0.19        |
| <b>Lochanhead<br/>LNH</b>         | CD23  | 56.62                    | 13.77                                  | 11.72                                  | 4.50        | 7.44        | 2.91                      | 1.58                     | 1.23                     | 0.22                                  | 0.19        |
|                                   | CD25  | 55.62                    | 13.68                                  | 12.34                                  | 4.69        | 7.80        | 2.96                      | 1.22                     | 1.28                     | 0.21                                  | 0.20        |
|                                   | CD34  | 56.88                    | 13.51                                  | 11.42                                  | 4.40        | 7.27        | 2.91                      | 1.39                     | 1.19                     | 0.21                                  | 0.19        |
|                                   | CD38  | 54.24                    | 13.66                                  | 13.28                                  | 4.59        | 7.99        | 2.60                      | 1.49                     | 1.41                     | 0.22                                  | 0.20        |
|                                   | CD94  | 56.30                    | 13.73                                  | 11.60                                  | 4.41        | 7.39        | 2.96                      | 1.32                     | 1.20                     | 0.25                                  | 0.18        |
|                                   | CD105 | 56.13                    | 13.54                                  | 12.35                                  | 4.61        | 7.46        | 2.70                      | 1.08                     | 1.27                     | 0.14                                  | 0.19        |
| <b>Braco<br/>BRA</b>              | CD57  | 53.89                    | 13.49                                  | 13.97                                  | 4.43        | 6.84        | 2.59                      | 1.66                     | 1.47                     | 0.20                                  | 0.20        |
|                                   | CD58  | 59.02                    | 13.71                                  | 10.77                                  | 3.82        | 5.56        | 2.35                      | 2.92                     | 1.18                     | 0.22                                  | 0.17        |
|                                   | CD59  | 56.15                    | 13.84                                  | 11.59                                  | 4.52        | 6.00        | 2.22                      | 2.90                     | 1.18                     | 0.20                                  | 0.19        |
|                                   | CD78  | 54.85                    | 13.79                                  | 12.70                                  | 4.64        | 7.16        | 2.51                      | 1.42                     | 1.30                     | 0.23                                  | 0.20        |
|                                   | CD79  | 55.91                    | 13.72                                  | 11.49                                  | 4.50        | 6.78        | 2.57                      | 2.31                     | 1.19                     | 0.26                                  | 0.17        |
| <b>Skeoch-Darngarroch<br/>SKD</b> | CD21  | 58.78                    | 13.54                                  | 10.47                                  | 3.84        | 5.79        | 2.90                      | 2.47                     | 1.17                     | 0.22                                  | 0.18        |
|                                   | CD22  | 58.13                    | 13.65                                  | 10.64                                  | 3.92        | 5.48        | 2.46                      | 3.85                     | 1.17                     | 0.23                                  | 0.18        |
|                                   | CD26  | 58.07                    | 13.83                                  | 10.75                                  | 3.89        | 5.34        | 2.88                      | 3.53                     | 1.19                     | 0.22                                  | 0.19        |
|                                   | CD27  | 58.85                    | 13.53                                  | 10.82                                  | 3.87        | 5.49        | 2.89                      | 3.01                     | 1.18                     | 0.22                                  | 0.19        |
|                                   | CD28  | 55.27                    | 13.88                                  | 12.10                                  | 4.69        | 7.54        | 2.68                      | 1.88                     | 1.25                     | 0.20                                  | 0.21        |
|                                   | CD30  | 56.39                    | 13.66                                  | 11.49                                  | 4.69        | 6.73        | 2.98                      | 1.86                     | 1.21                     | 0.22                                  | 0.21        |
|                                   | CD31  | 56.36                    | 13.71                                  | 11.57                                  | 4.83        | 6.95        | 2.66                      | 2.13                     | 1.19                     | 0.21                                  | 0.19        |
|                                   | CD56  | 59.18                    | 13.69                                  | 10.73                                  | 3.73        | 4.96        | 2.59                      | 3.04                     | 1.18                     | 0.22                                  | 0.18        |
|                                   | CD80  | 57.81                    | 13.65                                  | 10.40                                  | 3.94        | 5.20        | 3.04                      | 3.18                     | 1.14                     | 0.26                                  | 0.17        |
| CD81                              | 56.29 | 13.67                    | 11.67                                  | 4.62                                   | 6.59        | 2.84        | 2.47                      | 1.21                     | 0.24                     | 0.19                                  |             |
| <b>Castramon Hill<br/>CAS</b>     | CD61  | 55.96                    | 13.78                                  | 11.42                                  | 4.52        | 7.24        | 2.87                      | 1.51                     | 1.19                     | 0.26                                  | 0.18        |
|                                   | CD89  | 56.41                    | 13.94                                  | 11.63                                  | 4.60        | 7.41        | 2.97                      | 1.47                     | 1.22                     | 0.28                                  | 0.18        |
|                                   | CD90  | 56.05                    | 13.74                                  | 11.45                                  | 4.54        | 7.30        | 3.05                      | 1.23                     | 1.20                     | 0.25                                  | 0.18        |
|                                   | CD92  | 56.15                    | 13.66                                  | 11.21                                  | 4.32        | 7.21        | 3.07                      | 1.32                     | 1.19                     | 0.26                                  | 0.18        |
| <b>Craigmuir Moor<br/>CRM</b>     | CD12  | 55.58                    | 13.59                                  | 11.94                                  | 4.63        | 7.38        | 2.73                      | 1.70                     | 1.23                     | 0.21                                  | 0.21        |
|                                   | CD13  | 55.57                    | 13.69                                  | 11.46                                  | 4.62        | 7.33        | 2.70                      | 1.81                     | 1.22                     | 0.22                                  | 0.21        |
|                                   | CD15  | 55.33                    | 13.88                                  | 11.92                                  | 4.62        | 6.78        | 2.79                      | 1.81                     | 1.22                     | 0.22                                  | 0.31        |
|                                   | CD51  | 57.31                    | 13.79                                  | 11.75                                  | 4.73        | 6.74        | 2.85                      | 1.33                     | 1.21                     | 0.21                                  | 0.18        |
|                                   | CD52  | 56.68                    | 13.58                                  | 11.87                                  | 4.77        | 6.34        | 2.53                      | 1.86                     | 1.21                     | 0.21                                  | 0.17        |
|                                   | CD55  | 56.90                    | 13.76                                  | 11.74                                  | 4.66        | 6.25        | 2.49                      | 2.13                     | 1.19                     | 0.21                                  | 0.19        |

|                              | code  | SiO2  | Al2O3 | Fe2O3 | MgO  | CaO  | Na2O | K2O  | TiO2 | P2O5 | MnO  |
|------------------------------|-------|-------|-------|-------|------|------|------|------|------|------|------|
|                              |       | wt %  | wt %  | wt %  | wt % | wt % | wt % | wt % | wt % | wt % | wt % |
| <b>Shield Burn</b><br>SHB    | CD1   | 57.45 | 13.48 | 10.59 | 3.92 | 5.66 | 3.09 | 2.45 | 1.14 | 0.22 | 0.18 |
|                              | CD10  | 55.63 | 13.77 | 11.52 | 4.53 | 6.08 | 3.24 | 2.65 | 1.21 | 0.22 | 0.18 |
|                              | CD2   | 54.42 | 13.75 | 11.98 | 4.72 | 7.48 | 2.70 | 1.71 | 1.25 | 0.21 | 0.20 |
|                              | CD4   | 61.50 | 13.74 | 9.72  | 2.35 | 4.76 | 3.48 | 2.45 | 1.22 | 0.25 | 0.16 |
|                              | CD46  | 63.97 | 13.27 | 8.64  | 1.91 | 2.93 | 2.53 | 3.57 | 1.15 | 0.26 | 0.13 |
|                              | CD47  | 58.33 | 13.60 | 10.91 | 3.96 | 4.74 | 2.87 | 3.10 | 1.15 | 0.22 | 0.16 |
|                              | CD5   | 54.11 | 13.77 | 12.99 | 4.87 | 7.50 | 2.74 | 1.65 | 1.36 | 0.22 | 0.22 |
|                              | CD6   | 57.41 | 13.74 | 11.25 | 4.06 | 5.37 | 3.16 | 2.98 | 1.22 | 0.23 | 0.18 |
|                              | CD7   | 54.66 | 13.54 | 12.43 | 4.88 | 7.15 | 2.82 | 1.71 | 1.29 | 0.21 | 0.20 |
| CD8                          | 52.75 | 13.42 | 13.46 | 4.69  | 6.99 | 2.88 | 1.74 | 1.45 | 0.21 | 0.21 |      |
| <b>Windy Standard</b><br>WST | WK3   | 56.70 | 13.79 | 11.78 | 4.57 | 6.82 | 2.82 | 1.34 | 1.22 | 0.21 | 0.18 |
|                              | WK4   | 56.25 | 13.55 | 11.56 | 4.37 | 6.36 | 2.51 | 1.66 | 1.18 | 0.20 | 0.17 |
|                              | CD82  | 56.13 | 13.85 | 11.36 | 4.40 | 7.39 | 2.86 | 1.47 | 1.21 | 0.26 | 0.18 |
|                              | CD73  | 55.54 | 13.53 | 11.80 | 4.55 | 6.98 | 2.16 | 1.56 | 1.19 | 0.22 | 0.19 |
|                              | CD75  | 55.58 | 13.73 | 12.19 | 4.66 | 7.34 | 2.36 | 1.41 | 1.27 | 0.22 | 0.19 |
|                              | CD86  | 54.61 | 13.37 | 11.88 | 4.48 | 7.51 | 2.48 | 1.67 | 1.23 | 0.24 | 0.19 |
|                              | CD93  | 55.02 | 13.42 | 11.44 | 4.51 | 7.42 | 2.76 | 1.38 | 1.21 | 0.26 | 0.18 |
|                              | CD100 | 56.92 | 13.55 | 11.36 | 4.50 | 7.15 | 2.32 | 1.75 | 1.20 | 0.15 | 0.20 |
|                              | CD102 | 55.52 | 12.89 | 11.53 | 4.57 | 6.98 | 2.54 | 1.11 | 1.20 | 0.14 | 0.19 |
| CD103                        | 56.02 | 13.38 | 11.86 | 4.73  | 7.17 | 2.67 | 1.14 | 1.23 | 0.15 | 0.19 |      |
| <b>Other Dykes</b>           |       |       |       |       |      |      |      |      |      |      |      |
| Coatshill Quarry             | E1    | 60.03 | 13.87 | 8.58  | 4.44 | 6.39 | 2.56 | 2.74 | 0.84 | 0.21 | 0.13 |
| Breconside                   | E2    | 58.18 | 14.21 | 9.13  | 4.91 | 6.38 | 2.63 | 2.49 | 0.90 | 0.23 | 0.14 |
| Stoneyburn                   | S1    | 52.70 | 13.94 | 11.46 | 6.18 | 9.91 | 2.45 | 1.12 | 1.25 | 0.24 | 0.16 |
| Stoneyburn                   | S4    | 55.87 | 13.69 | 10.45 | 5.30 | 8.27 | 2.56 | 1.82 | 1.14 | 0.24 | 0.16 |
| Kello Water                  | KW1   | 51.80 | 13.67 | 14.06 | 5.35 | 7.81 | 2.34 | 1.08 | 1.39 | 0.22 | 0.23 |
| Kello Water                  | KW2   | 50.99 | 14.02 | 13.30 | 4.78 | 8.21 | 2.23 | 0.95 | 1.43 | 0.22 | 0.17 |
| Afton Water                  | AW1   | 50.76 | 13.23 | 15.30 | 4.41 | 7.35 | 2.67 | 1.31 | 2.07 | 0.31 | 0.22 |
| Dalleagles Burn              | AW5   | 51.58 | 13.07 | 14.65 | 4.17 | 7.54 | 2.84 | 1.38 | 2.04 | 0.26 | 0.24 |
| Mossdale                     | M1    | 51.96 | 13.47 | 15.40 | 4.06 | 7.45 | 3.04 | 1.44 | 2.08 | 0.26 | 0.23 |
| Dalgig Burn                  | DB    | 57.55 | 16.17 | 8.00  | 4.00 | 7.91 | 2.12 | 1.91 | 0.75 | 0.12 | 0.17 |
| Vennel                       | V1    | 56.23 | 15.93 | 8.10  | 4.65 | 8.67 | 2.08 | 1.53 | 0.74 | 0.10 | 0.14 |

## Appendix E: Geochemical Data

### 3 - Trace Elements

|                                  | code  | Ba  | Co  | Cr  | Cu  | Li  | Nb  | Ni  | Sc  | Sr  | V   | Y   | Zn  | Zr  |
|----------------------------------|-------|-----|-----|-----|-----|-----|-----|-----|-----|-----|-----|-----|-----|-----|
|                                  |       | ppm |
| <b>Cleveland Dyke Sectors</b>    |       |     |     |     |     |     |     |     |     |     |     |     |     |     |
| <b>East of River Nith</b><br>ERN | CD39  | 449 | 30  | 43  | 48  | 20  | 11  | 34  | 34  | 215 | 237 | 41  | 90  | 188 |
|                                  | CD41  | 468 | 29  | 43  | 35  | 19  | 11  | 26  | 34  | 214 | 238 | 44  | 89  | 192 |
|                                  | CD88  | 474 | 31  | 38  | 34  | 22  |     | 32  | 37  | 247 | 276 | 43  | 98  | 221 |
|                                  | CD101 | 444 | 31  | 34  | 40  | 12  |     | 23  | 37  | 225 | 262 | 43  | 98  | 209 |
| <b>Lochanhead</b><br>LNH         | CD23  | 507 | 31  | 44  | 40  | 15  | 11  | 32  | 37  | 246 | 260 | 45  | 97  | 218 |
|                                  | CD25  | 400 | 33  | 42  | 35  | 17  | 9   | 29  | 38  | 231 | 296 | 43  | 99  | 187 |
|                                  | CD34  | 473 | 30  | 43  | 39  | 18  | 11  | 29  | 35  | 228 | 253 | 43  | 95  | 189 |
|                                  | CD38  | 605 | 34  | 37  | 22  | 20  | 9   | 24  | 39  | 383 | 359 | 41  | 105 | 177 |
|                                  | CD94  | 448 | 30  | 43  | 39  | 14  |     | 32  | 36  | 231 | 252 | 43  | 99  | 235 |
|                                  | CD105 | 409 | 33  | 31  | 35  | 13  |     | 20  | 39  | 232 | 296 | 42  | 98  | 266 |
| <b>Braco</b><br>BRA              | CD57  | 438 | 36  | 37  | 22  | 37  | 10  | 23  | 41  | 261 | 391 | 49  | 92  | 160 |
|                                  | CD58  | 556 | 27  | 42  | 38  | 31  | 11  | 29  | 34  | 210 | 208 | 53  | 82  | 222 |
|                                  | CD59  | 521 | 30  | 47  | 39  | 28  | 10  | 30  | 37  | 211 | 251 | 47  | 80  | 144 |
|                                  | CD78  | 450 | 34  | 29  | 33  | 33  | 8   | 34  | 39  | 237 | 309 | 45  | 91  | 215 |
|                                  | CD79  | 486 | 29  | 45  | 53  | 66  |     | 39  | 37  | 234 | 250 | 44  | 92  | 217 |
| <b>Skeoch-Darngarroch</b><br>SKD | CD21  | 593 | 26  | 41  | 35  | 34  | 12  | 28  | 31  | 201 | 206 | 46  | 94  | 249 |
|                                  | CD22  | 778 | 27  | 43  | 38  | 44  | 11  | 28  | 32  | 211 | 215 | 48  | 96  | 248 |
|                                  | CD26  | 707 | 27  | 40  | 34  | 39  | 13  | 29  | 31  | 202 | 214 | 48  | 97  | 226 |
|                                  | CD27  | 670 | 27  | 41  | 36  | 36  | 12  | 30  | 32  | 213 | 216 | 48  | 99  | 205 |
|                                  | CD28  | 474 | 31  | 43  | 29  | 47  | 10  | 26  | 38  | 228 | 282 | 43  | 104 | 174 |
|                                  | CD30  | 493 | 30  | 43  | 39  | 39  | 11  | 31  | 35  | 221 | 256 | 44  | 105 | 177 |
|                                  | CD31  | 532 | 31  | 46  | 40  | 36  | 10  | 30  | 37  | 217 | 263 | 41  | 96  | 175 |
|                                  | CD56  | 700 | 25  | 51  | 33  | 38  | 13  | 30  | 33  | 215 | 207 | 52  | 83  | 204 |
|                                  | CD80  | 552 | 26  | 52  | 76  | 36  |     | 55  | 32  | 201 | 195 | 46  | 94  | 273 |
|                                  | CD81  | 460 | 30  | 41  | 33  | 28  |     | 34  | 38  | 212 | 259 | 45  | 97  | 221 |
| <b>Castramon Hill</b><br>CAS     | CD61  | 440 | 30  | 43  | 40  | 19  |     | 31  | 37  | 233 | 250 | 43  | 98  | 226 |
|                                  | CD89  | 482 | 31  | 44  | 39  | 18  |     | 31  | 37  | 239 | 257 | 44  | 100 | 229 |
|                                  | CD90  | 443 | 31  | 43  | 39  | 21  |     | 34  | 37  | 229 | 253 | 43  | 100 | 221 |
|                                  | CD92  | 438 | 30  | 43  | 38  | 25  |     | 34  | 35  | 230 | 242 | 44  | 100 | 297 |
| <b>Craigmuie Moor</b><br>CRM     | CD12  | 448 | 33  | 45  | 33  | 23  | 8   | 24  | 38  | 223 | 270 | 45  | 86  | 82  |
|                                  | CD13  | 464 | 31  | 44  | 44  | 27  | 9   | 24  | 37  | 222 | 256 | 44  | 88  | 94  |
|                                  | CD15  | 485 | 33  | 39  | 39  | 26  | 8   | 26  | 37  | 222 | 256 | 46  | 87  | 68  |
|                                  | CD51  | 476 | 31  | 47  | 44  | 12  | 10  | 30  | 38  | 236 | 255 | 49  | 82  | 182 |
|                                  | CD52  | 465 | 31  | 48  | 59  | 19  | 10  | 34  | 38  | 215 | 253 | 49  | 87  | 180 |
|                                  | CD55  | 500 | 31  | 48  | 45  | 20  | 10  | 32  | 37  | 211 | 250 | 49  | 84  | 170 |

|                       | <b>code</b> | <b>Ba</b> | <b>Co</b> | <b>Cr</b> | <b>Cu</b> | <b>Li</b> | <b>Nb</b> | <b>Ni</b> | <b>Sc</b> | <b>Sr</b> | <b>V</b> | <b>Y</b> | <b>Zn</b> | <b>Zr</b> |
|-----------------------|-------------|-----------|-----------|-----------|-----------|-----------|-----------|-----------|-----------|-----------|----------|----------|-----------|-----------|
|                       |             | ppm       | ppm      | ppm      | ppm       | ppm       |
| <b>Shield Burn</b>    | CD1         | 600       | 26        | 46        | 42        | 39        | 10        | 25        | 32        | 209       | 199      | 46       | 79        | 165       |
| SHB                   | CD10        | 521       | 31        | 39        | 40        | 25        | 9         | 24        | 37        | 201       | 250      | 46       | 86        | 84        |
|                       | CD2         | 450       | 34        | 40        | 34        | 30        | 8         | 22        | 39        | 224       | 282      | 45       | 88        | 59        |
|                       | CD4         | 794       | 19        | 29        | 23        | 18        | 13        | 16        | 26        | 234       | 142      | 56       | 89        | 244       |
|                       | CD46        | 875       | 12        | 23        | 17        | 31        | 17        | 14        | 21        | 206       | 97       | 62       | 82        | 270       |
|                       | CD47        | 546       | 27        | 42        | 45        | 22        | 11        | 30        | 34        | 175       | 211      | 53       | 80        | 192       |
|                       | CD5         | 424       | 35        | 33        | 30        | 22        | 8         | 20        | 40        | 243       | 334      | 45       | 94        | 56        |
|                       | CD6         | 570       | 28        | 38        | 35        | 26        | 10        | 23        | 33        | 184       | 221      | 49       | 88        | 104       |
|                       | CD7         | 447       | 35        | 39        | 33        | 26        | 8         | 19        | 39        | 222       | 305      | 45       | 90        | 79        |
|                       | CD8         | 458       | 35        | 32        | 18        | 28        | 7         | 13        | 40        | 237       | 374      | 41       | 96        | 73        |
| <b>Windy Standard</b> | WK3         | 449       | 31        | 44        | 43        | 15        | 10        | 30        | 38        | 223       | 265      | 48       | 82        | 157       |
| WST                   | WK4         | 435       | 30        | 43        | 45        | 23        | 10        | 26        | 36        | 214       | 256      | 45       | 80        | 164       |
|                       | CD82        | 416       | 30        | 40        | 37        | 19        |           | 33        | 37        | 275       | 252      | 44       | 97        | 223       |
|                       | CD73        | 606       | 31        | 39        | 31        | 18        | 9         | 38        | 37        | 263       | 254      | 44       | 86        | 220       |
|                       | CD75        | 438       | 32        | 30        | 38        | 14        | 9         | 33        | 39        | 282       | 281      | 44       | 90        | 205       |
|                       | CD86        | 458       | 32        | 38        | 34        | 23        |           | 30        | 37        | 245       | 275      | 43       | 99        | 210       |
|                       | CD93        | 506       | 31        | 40        | 36        | 16        |           | 30        | 37        | 262       | 266      | 42       | 98        | 219       |
|                       | CD100       | 467       | 30        | 33        | 35        | 17        |           | 21        | 37        | 280       | 251      | 42       | 97        | 224       |
|                       | CD102       | 404       | 31        | 29        | 34        | 24        |           | 19        | 38        | 220       | 278      | 41       | 94        | 227       |
|                       | CD103       | 410       | 32        | 31        | 34        | 19        |           | 21        | 38        | 219       | 281      | 41       | 97        | 214       |
| <b>Other Dykes</b>    |             |           |           |           |           |           |           |           |           |           |          |          |           |           |
| Coatshill Quarry      | E1          | 493       | 25        | 179       | 64        | 33        |           | 49        | 32        | 164       | 160      | 43       | 68        | 263       |
| Breconside            | E2          | 516       | 26        | 185       | 65        | 50        |           | 46        | 33        | 150       | 183      | 41       | 79        | 266       |
| Stoneyburn            | S1          | 302       | 35        | 181       | 65        | 24        |           | 51        | 43        | 208       | 278      | 38       | 89        | 219       |
| Stoneyburn            | S4          | 380       | 32        | 154       | 82        | 25        |           | 58        | 38        | 185       | 231      | 41       | 84        | 230       |
| Kello Water           | KW1         | 358       | 36        | 37        | 38        | 32        | 7         | 33        | 43        | 230       | 366      | 42       | 99        | 172       |
| Kello Water           | KW2         | 315       | 34        | 37        | 28        | 32        | 7         | 31        | 45        | 253       | 381      | 43       | 99        | 170       |
| Afton Water           | AW1         | 453       | 29        | 24        | 46        | 19        | 11        | 29        | 39        | 255       | 382      | 54       | 113       | 242       |
| Dalleagles Burn       | AW5         | 471       | 39        | 14        | 41        | 18        |           | 16        | 38        | 258       | 366      | 51       | 120       | 249       |
| Mossdale              | M1          | 487       | 40        | 12        | 42        | 20        |           | 16        | 39        | 259       | 284      | 53       | 121       | 252       |
| Dalgig Burn           | DB          | 594       | 23        | 156       | 64        | 16        |           | 27        | 28        | 220       | 146      | 33       | 79        | 210       |
| Vennel                | V1          | 408       | 26        | 181       | 76        | 17        |           | 31        | 31        | 196       | 158      | 31       | 77        | 204       |

## Appendix E: Geochemical Data

### 4 – Rare Earth Elements: Lanthanide Series

|                                  | code  | La<br>ppm | Ce<br>ppm | Nd<br>ppm | Sm<br>ppm | Eu<br>ppm | Dy<br>ppm | Yb<br>ppm |
|----------------------------------|-------|-----------|-----------|-----------|-----------|-----------|-----------|-----------|
| <b>Cleveland Dyke Sectors</b>    |       |           |           |           |           |           |           |           |
| <b>East of River Nith</b><br>ERN | CD39  | 30        | 56        | 23        | 7.0       | 1.4       | 5.7       | 3.3       |
|                                  | CD41  | 31        | 58        | 24        | 7.2       | 1.4       | 5.9       | 3.5       |
|                                  | CD88  | 23        | 46        | 31        | 5.9       | 1.3       | 5.7       | 2.8       |
|                                  | CD101 | 21        | 49        | 26        | 3.3       | 3.6       | 6.4       | 4.4       |
| <b>Lochanhead</b><br>LNH         | CD23  | 30        | 56        | 25        | 7.1       | 1.5       | 6.0       | 3.6       |
|                                  | CD25  | 26        | 49        | 21        | 6.3       | 1.4       | 5.8       | 3.6       |
|                                  | CD34  | 29        | 56        | 25        | 7.2       | 1.4       | 6.0       | 3.4       |
|                                  | CD38  | 25        | 47        | 20        | 6.3       | 1.4       | 5.6       | 3.4       |
|                                  | CD94  | 26        | 51        | 33        | 6.1       | 1.3       | 5.7       | 3.1       |
|                                  | CD105 | 21        | 44        | 23        | 3.2       | 3.5       | 6.2       | 4.5       |
| <b>Braco</b><br>BRA              | CD57  | 28        | 46        | 19        | 6.0       | 1.5       | 6.3       | 3.7       |
|                                  | CD58  | 39        | 66        | 29        | 6.7       | 1.5       | 6.7       | 4.0       |
|                                  | CD59  | 32        | 54        | 25        | 6.2       | 1.4       | 6.2       | 3.5       |
|                                  | CD78  | 27        | 47        | 21        | 5.6       | 1.4       | 6.1       | 3.5       |
|                                  | CD79  | 25        | 50        | 32        | 5.9       | 1.4       | 5.6       | 3.0       |
| <b>Skeoch-Darngarroch</b><br>SKD | CD21  | 35        | 66        | 29        | 8.0       | 1.5       | 6.4       | 3.7       |
|                                  | CD22  | 35        | 66        | 29        | 7.8       | 1.5       | 6.5       | 3.7       |
|                                  | CD26  | 35        | 66        | 28        | 7.5       | 1.5       | 6.4       | 3.8       |
|                                  | CD27  | 35        | 67        | 27        | 7.6       | 1.5       | 6.3       | 3.7       |
|                                  | CD28  | 28        | 49        | 20        | 6.1       | 1.4       | 5.7       | 3.4       |
|                                  | CD30  | 29        | 55        | 24        | 7.0       | 1.4       | 5.9       | 3.4       |
|                                  | CD31  | 28        | 54        | 23        | 6.7       | 1.4       | 5.7       | 3.2       |
|                                  | CD56  | 39        | 70        | 32        | 7.9       | 1.6       | 6.8       | 4.0       |
|                                  | CD80  | 31        | 63        | 38        | 6.5       | 1.4       | 5.9       | 3.2       |
| CD81                             | 26    | 50        | 32        | 5.9       | 1.4       | 5.7       | 3.1       |           |
| <b>Castramon Hill</b><br>CAS     | CD61  | 25        | 50        | 33        | 6.1       | 1.3       | 5.7       | 2.9       |
|                                  | CD89  | 26        | 52        | 34        | 6.3       | 1.4       | 5.9       | 2.8       |
|                                  | CD90  | 25        | 51        | 34        | 6.3       | 1.3       | 5.7       | 2.9       |
|                                  | CD92  | 26        | 52        | 34        | 6.0       | 1.4       | 5.7       | 3.0       |
| <b>Craigmuiie Moor</b><br>CRM    | CD12  | 26        | 49        | 22        | 5.2       | 1.2       | 5.3       | 3.1       |
|                                  | CD13  | 26        | 49        | 23        | 5.1       | 1.2       | 5.3       | 3.1       |
|                                  | CD15  | 26        | 49        | 21        | 4.9       | 1.2       | 5.5       | 3.1       |
|                                  | CD51  | 33        | 56        | 24        | 6.5       | 1.5       | 6.4       | 3.7       |
|                                  | CD52  | 33        | 56        | 25        | 6.4       | 1.4       | 6.3       | 3.8       |
|                                  | CD55  | 34        | 57        | 24        | 6.5       | 1.4       | 6.5       | 3.7       |

|                              | <b>code</b> | <b>La</b><br>ppm | <b>Ce</b><br>ppm | <b>Nd</b><br>ppm | <b>Sm</b><br>ppm | <b>Eu</b><br>ppm | <b>Dy</b><br>ppm | <b>Yb</b><br>ppm |
|------------------------------|-------------|------------------|------------------|------------------|------------------|------------------|------------------|------------------|
| <b>Shield Burn</b><br>SHB    | CD1         | 31               | 59               | 26               | 5.6              | 1.2              | 5.6              | 3.1              |
|                              | CD10        | 27               | 51               | 24               | 5.6              | 1.2              | 5.6              | 3.2              |
|                              | CD2         | 24               | 45               | 20               | 4.7              | 1.2              | 5.4              | 3.1              |
|                              | CD4         | 42               | 82               | 37               | 7.6              | 1.4              | 6.7              | 3.8              |
|                              | CD46        | 52               | 99               | 42               | 9.5              | 1.8              | 8.0              | 4.7              |
|                              | CD47        | 38               | 64               | 28               | 6.8              | 1.5              | 6.6              | 3.9              |
|                              | CD5         | 23               | 43               | 20               | 4.8              | 1.2              | 5.4              | 3.0              |
|                              | CD6         | 32               | 60               | 26               | 5.9              | 1.3              | 5.8              | 3.3              |
|                              | CD7         | 24               | 43               | 20               | 4.8              | 1.1              | 5.3              | 3                |
| CD8                          | 23          | 40               | 19               | 4.7              | 1.2              | 5.2              | 2.7              |                  |
| <b>Windy Standard</b><br>WST | WK3         | 32               | 56               | 25               | 6.6              | 1.4              | 6.4              | 3.7              |
|                              | WK4         | 31               | 53               | 26               | 6.1              | 1.4              | 6.2              | 3.6              |
|                              | CD82        | 26               | 51               | 32               | 5.9              | 1.3              | 5.7              | 3.1              |
|                              | CD73        | 29               | 51               | 24               | 5.9              | 1.3              | 5.8              | 3.4              |
|                              | CD75        | 28               | 50               | 24               | 5.9              | 1.3              | 6.0              | 3.6              |
|                              | CD86        | 23               | 47               | 31               | 5.8              | 1.3              | 5.6              | 2.9              |
|                              | CD93        | 24               | 48               | 31               | 3.0              | 1.3              | 5.6              | 3.1              |
|                              | CD100       | 21               | 51               | 20               | 3.1              | 3.4              | 6.4              | 4.3              |
|                              | CD102       | 18               | 45               | 23               | 3.3              | 3.0              | 6.2              | 4.3              |
| CD103                        | 20          | 43               | 23               | 3.2              | 3.2              | 6.2              | 4.3              |                  |
| <b>Other Dykes</b>           |             |                  |                  |                  |                  |                  |                  |                  |
| Coatshill Quarry             | E1          | 32               | 64               | 38               | 6.6              | 1.1              | 5.7              | 3.1              |
| Breconside                   | E2          | 29               | 57               | 35               | 6.2              | 1.2              | 5.5              | 2.8              |
| Stoneyburn                   | S1          | 17               | 37               | 26               | 5.3              | 1.2              | 5.2              | 2.5              |
| Stoneyburn                   | S4          | 24               | 48               | 32               | 5.9              | 1.2              | 5.4              | 2.8              |
| Kello Water                  | KW1         | 22               | 36               | 19               | 5.0              | 1.3              | 5.7              | 3.3              |
| Kello Water                  | KW2         | 21               | 36               | 18               | 5.1              | 1.3              | 5.6              | 3.3              |
| Afton Water                  | AW1         | 30               | 56               | 31               | 7.9              | 1.8              | 7.7              | 4.2              |
| Dalleagles Burn              | AW5         | 26               | 56               | 29               | 4.1              | 4.5              | 9.6              | 5.4              |
| Mossdale                     | M1          | 20               | 54               | 31               | 4.8              | 4.8              | 8.1              | 5.6              |
| Dalgig Burn                  | DB          | 26               | 54               | 24               | 2.5              | 1.8              | 5.2              | 3.1              |
| Vennel                       | V1          | 23               | 47               | 21               | 2                | 1.8              | 4.6              | 3                |
